# Supplementary material
Source: Springer Nature journal article supplement (https://www.springermedizin.de/resource/supplementary/12889_2012_4616_MOESM3_ESM.pdf/9493240)
Supplement: MOESM3 [file 9493240]

### Additional file 3

**Table Disease Model Parameters and Values: scenario specific  
The AsiaFluCap Simulator**

| SEIR parameter | Description                                                      | Scenario* | Value <sup>†</sup> | Justification/notes                                                                                                                                                                                                                                                   |
|----------------|------------------------------------------------------------------|-----------|--------------------|-----------------------------------------------------------------------------------------------------------------------------------------------------------------------------------------------------------------------------------------------------------------------|
| p <sub>c</sub> | proportion of cases that are critical (require hospitalisation)  | MiS       | 0.002              | 0.16% [1] and 0.45% [2] of symptomatic cases hospitalised.                                                                                                                                                                                                            |
|                |                                                                  | MoS       | 0.0065             | Average of MiS and SeS                                                                                                                                                                                                                                                |
|                |                                                                  | SeS       | 0.015              | CHR: 2.0% - 15.0% [3], 0.00345% - 3.36% depending on age groups [4], 6.0% [5], 0.8%-15.357% age-dependent [6], 5.0%- 13.0% [7].                                                                                                                                       |
| p <sub>a</sub> | Proportion of cases that are asymptomatic                        | MiS       | 0.30               | Values range from 30 to 50% [2, 8, 9].                                                                                                                                                                                                                                |
|                |                                                                  | MoS       | 0.30               |                                                                                                                                                                                                                                                                       |
|                |                                                                  | SeS       | 0.30               |                                                                                                                                                                                                                                                                       |
| p <sub>m</sub> | Proportion of cases that are mild                                | MiS       | 0.6980             | $p_m = 1 - p_a - p_c$                                                                                                                                                                                                                                                 |
|                |                                                                  | MoS       | 0.6935             |                                                                                                                                                                                                                                                                       |
|                |                                                                  | SeS       | 0.6850             |                                                                                                                                                                                                                                                                       |
| p <sub>v</sub> | Proportion of hospitalised cases needing ventilation             | MiS       | 0.1                | Assumption based on: 10-39% of hospitalised patients admitted to ICU [10], 21% of hospitalised cases needing intensive care treatment [11], 18%-20% of hospitalised cases needing ventilation, 0.002-0.035% of symptomatic cases need ICU treatment [12-14].          |
|                |                                                                  | MoS       | 0.20               | Average of MiS and SeS                                                                                                                                                                                                                                                |
|                |                                                                  | SeS       | 0.30               | Assumption based on: 88% of H5N1 cases required ventilatory support for respiratory failure [15]. Respiratory failure is common, and some patients have developed the acute respiratory distress syndrome with very high mortality [16].                              |
| d <sub>c</sub> | Proportion of critical outpatients without AV treatment that die | MiS       | 0.25               | Proportion of deaths are extrapolated from the following assumptions: 41.4% (CI 28.9-55.0) CFR for critical illness [17], 17.3% (12.0-24.0) for critical illness [18], 11% of hospitalised cases died [14], 7% of hospitalised cases died [19], 0.007% of symptomatic |

|          |                                                                               |     |        |                                                                                                                                                                                                                                                                                                                                                                                                                                                                   |
|----------|-------------------------------------------------------------------------------|-----|--------|-------------------------------------------------------------------------------------------------------------------------------------------------------------------------------------------------------------------------------------------------------------------------------------------------------------------------------------------------------------------------------------------------------------------------------------------------------------------|
|          |                                                                               |     |        | cases died [1]. CFR 2.5% [20]. 0.00147-1.69% CFR depending on age groups [4].                                                                                                                                                                                                                                                                                                                                                                                     |
|          |                                                                               | MoS | 0.375  | Average of MiS and SeS                                                                                                                                                                                                                                                                                                                                                                                                                                            |
|          |                                                                               | SeS | 0.50   | Proportion of deaths are extrapolated from the assumptions: Of the 573 H5N1 WHO-confirmed cases, 58.6% have resulted in death [21], CFR Human H5N1 cases ranged from 44% in Egypt to 80% in Indonesia [22, 23]. In 262 (61%) of sporadic cases of H5N1 virus infection reported (from 15 countries) the patient died [16]. 26 patients died out of 67 (CFR: 39%; 95% confidence interval, 27%–51%) [24]. The overall mortality rate of H5N1 cases was 56.5% [25]. |
| $d_{ca}$ | Proportion of critical outpatients under AV treatment that die                | MiS | 0.150  | Based on $d_{ca} = d_c(1-\pi_a)$                                                                                                                                                                                                                                                                                                                                                                                                                                  |
|          |                                                                               | MoS | 0.1875 |                                                                                                                                                                                                                                                                                                                                                                                                                                                                   |
|          |                                                                               | SeS | 0.200  |                                                                                                                                                                                                                                                                                                                                                                                                                                                                   |
| $d_h$    | Proportion of hospitalised cases without AV treatment that die                | MiS | 0.100  | Based on $d_h = d_c(1-\pi_h)$ .                                                                                                                                                                                                                                                                                                                                                                                                                                   |
|          |                                                                               | MoS | 0.178  |                                                                                                                                                                                                                                                                                                                                                                                                                                                                   |
|          |                                                                               | SeS | 0.280  |                                                                                                                                                                                                                                                                                                                                                                                                                                                                   |
| $d_{ha}$ | Proportion of hospitalised cases under AV treatment that die                  | MiS | 0.06   | Based on $d_{ha} = d_c(1-\pi_a)(1-\pi_h)$ .                                                                                                                                                                                                                                                                                                                                                                                                                       |
|          |                                                                               | MoS | 0.089  |                                                                                                                                                                                                                                                                                                                                                                                                                                                                   |
|          |                                                                               | SeS | 0.11   |                                                                                                                                                                                                                                                                                                                                                                                                                                                                   |
| $d_v$    | Proportion of ventilated cases that die                                       | MiS | 0.25   | Based on $d_v = (1-\pi_v)$ .                                                                                                                                                                                                                                                                                                                                                                                                                                      |
|          |                                                                               | MoS | 0.375  |                                                                                                                                                                                                                                                                                                                                                                                                                                                                   |
|          |                                                                               | SeS | 0.50   |                                                                                                                                                                                                                                                                                                                                                                                                                                                                   |
| $\pi_a$  | Effectiveness of antiviral treatment at reducing death rate in critical cases | MiS | 0.40   | Assumption based on: [1, 17, 18]. Odds Ratio for reduction in influenza mortality in hospitalised cases: 0.21 (95% confidence interval 0.06-0.80) [26]. Patients who died were less likely to have received AV therapy within 48 hours after symptom onset [19].                                                                                                                                                                                                  |
|          |                                                                               | MoS | 0.50   | Average of MiS and SeS                                                                                                                                                                                                                                                                                                                                                                                                                                            |
|          |                                                                               | SeS | 0.60   | Assumption based on: of the 284 patients with known                                                                                                                                                                                                                                                                                                                                                                                                               |

age and outcome who received either oseltamivir alone or no anti-influenza antiviral, the crude overall survival rate of patients who received at least 1 dose of oseltamivir alone (OS+) was 60%, whereas survival among AV- patients was 24% [25]. A higher proportion of cases survived that received any AV treatment compared to those that did not receive AV: 67% vs 7%,  $p = 0.003$ ) [15].

|         |                                                                                                    |     |       |                                                                                                                                                                                                                                                                                    |
|---------|----------------------------------------------------------------------------------------------------|-----|-------|------------------------------------------------------------------------------------------------------------------------------------------------------------------------------------------------------------------------------------------------------------------------------------|
| $\pi_h$ | Effectiveness of hospitalised care (without AV treatment) at reducing death rate in critical cases | MiS | 0.6   | Assumption based on [1, 17, 18], 7% CFR hospitalised cases [19].                                                                                                                                                                                                                   |
|         |                                                                                                    | MoS | 0.525 | Average of MiS and SeS                                                                                                                                                                                                                                                             |
|         |                                                                                                    | SeS | 0.45  | Assumption based on: 12% of hospitalised died within 1 day of admission, and 30% died within 2 days [27], 25.5% of hospitalised cases died 1918-19 pandemic [28]                                                                                                                   |
| $\pi_v$ | Effectiveness of ventilators at preventing death in cases needing ventilation                      | MiS | 0.75  | Assumption based on [17, 18], 45% of ventilated cases died [19].                                                                                                                                                                                                                   |
|         |                                                                                                    | MoS | 0.625 | Average of MiS and SeS                                                                                                                                                                                                                                                             |
|         |                                                                                                    | SeS | 0.50  | Assumption based on: 12% of hospitalised died within 1 day of admission, and 30% died within 2 days [27]. Twenty-three (88%) of H5N1 cases required ventilatory support for respiratory failure, 65% of ventilated cases died [15]. Of the 7 who were ventilated, 2 survived [29]. |

\* MiS: Mild Scenario;  
MoS: Moderate Scenario;  
SeS: Severe Scenario

¶ All parameter values can be changed, either in interface or in the SEIR Model sheet.

## References

1. Presanis AM, De Angelis D, Hagy A, Reed C, Riley S, Cooper BS, Finelli L, Biedrzycki P, Lipsitch M: **The severity of pandemic H1N1 influenza in the United States, from April to July 2009: a Bayesian analysis.** *PLoS Med* 2009, **6**(12):e1000207.

2. Reed C, Angulo FJ, Swerdlow DL, Lipsitch M, Meltzer MI, Jernigan D, Finelli L: **Estimates of the prevalence of pandemic (H1N1) 2009, United States, April-July 2009.** *Emerg Infect Dis* 2009, **15**(12):2004-2007.
3. Doyle A, Bonmarin I, Levy-Bruhl D, Le Strat Y, Desenclos JC: **Influenza pandemic preparedness in France: modelling the impact of interventions.** *Journal of epidemiology and community health* 2006, **60**(5):399-404.
4. Mylius SD, Hagenaars TJ, Lugner AK, Wallinga J: **Optimal allocation of pandemic influenza vaccine depends on age, risk and timing.** *Vaccine* 2008, **26**(29-30):3742-3749.
5. Wu JT, Riley S, Fraser C, Leung GM: **Reducing the impact of the next influenza pandemic using household-based public health interventions.** *PLoS Med* 2006, **3**(9):e361.
6. Haber MJ, Shay DK, Davis XM, Patel R, Jin X, Weintraub E, Orenstein E, Thompson WW: **Effectiveness of interventions to reduce contact rates during a simulated influenza pandemic.** *Emerg Infect Dis* 2007, **13**(4):581-589.
7. Carrat F, Luong J, Lao H, Salle AV, Lajaunie C, Wackernagel H: **A 'small-world-like' model for comparing interventions aimed at preventing and controlling influenza pandemics.** *BMC Med* 2006, **4**:26.
8. Longini IM, Jr., Nizam A, Xu S, Ungchusak K, Hanshaoworakul W, Cummings DA, Halloran ME: **Containing pandemic influenza at the source.** *Science* 2005, **309**(5737):1083-1087.
9. Duerr HP, Brockmann SO, Piechotowski I, Schwehm M, Eichner M: **Influenza pandemic intervention planning using InFluSim: pharmaceutical and non-pharmaceutical interventions.** *BMC Infect Dis* 2007, **7**:76.
10. World Health Organisation: **Transmission dynamics and impact of pandemic influenza A (H1N1) 2009 virus.** *Wkly Epidemiol Rec* 2009:481-484.
11. Siva N: **Number of swine flu patients going into intensive care is rising.** *BMJ* 2009, **339**:b4528.
12. Haghdoost AA, Gooya MM, Baneshi MR: **Modelling of H1N1 flu in Iran.** *Archives of Iranian medicine* 2009, **12**(6):533-541.
13. Ercole A, Taylor BL, Rhodes A, Menon DK: **Modelling the impact of an influenza A/H1N1 pandemic on critical care demand from early pathogenicity data: the case for sentinel reporting.** *Anaesthesia* 2009, **64**(9):937-941.
14. Louie JK, Acosta M, Winter K, Jean C, Gavali S, Schechter R, Vugia D, Harriman K, Matyas B, Glaser CA *et al*: **Factors associated with death or hospitalization due to pandemic 2009 influenza A(H1N1) infection in California.** *JAMA* 2009, **302**(17):1896-1902.
15. Yu H, Gao Z, Feng Z, Shu Y, Xiang N, Zhou L, Huai Y, Feng L, Peng Z, Li Z *et al*: **Clinical characteristics of 26 human cases of highly pathogenic avian influenza A (H5N1) virus infection in China.** *PLoS One* 2008, **3**(8):e2985.

16. Uyeki TM: **Human infection with highly pathogenic avian influenza A (H5N1) virus: review of clinical issues.** *Clin Infect Dis* 2009, **49**(2):279-290.
17. Dominguez-Cherit G, Lapinsky SE, Macias AE, Pinto R, Espinosa-Perez L, de la Torre A, Poblano-Morales M, Baltazar-Torres JA, Bautista E, Martinez A *et al*: **Critically Ill patients with 2009 influenza A(H1N1) in Mexico.** *Jama* 2009, **302**(17):1880-1887.
18. Kumar A, Zarychanski R, Pinto R, Cook DJ, Marshall J, Lacroix J, Stelfox T, Bagshaw S, Choong K, Lamontagne F *et al*: **Critically ill patients with 2009 influenza A(H1N1) infection in Canada.** *JAMA* 2009, **302**(17):1872-1879.
19. Jain S, Kamimoto L, Bramley AM, Schmitz AM, Benoit SR, Louie J, Sugerman DE, Druckenmiller JK, Ritger KA, Chugh R *et al*: **Hospitalized patients with 2009 H1N1 influenza in the United States, April-June 2009.** *N Engl J Med* 2009, **361**(20):1935-1944.
20. Flahault A, Vergu E, Boelle PY: **Potential for a global dynamic of Influenza A (H1N1).** *BMC Infect Dis* 2009, **9**:129.
21. Wang TT, Parides MK, Palese P: **Seroevidence for H5N1 influenza infections in humans: meta-analysis.** *Science* 2012, **335**(6075):1463.
22. Organisation WH: **Epidemiology of WHO-confirmed human cases of avian influenza A(H5N1) infection.** *Wkly Epidemiol Rec* 2006, **81**(26):249-257.
23. Organisation WH: **Update: WHO-confirmed human cases of avian influenza A (H5N1) infection, November 2003-May 2008.** *Wkly Epidemiol Rec* 2008, **83**(46):415-420.
24. Liem NT, Tung CV, Hien ND, Hien TT, Chau NQ, Long HT, Hien NT, Mai le Q, Taylor WR, Wertheim H *et al*: **Clinical features of human influenza A (H5N1) infection in Vietnam: 2004-2006.** *Clin Infect Dis* 2009, **48**(12):1639-1646.
25. Adisasmito W, Chan PK, Lee N, Oner AF, Gasimov V, Aghayev F, Zaman M, Bamgboye E, Dogan N, Coker R *et al*: **Effectiveness of antiviral treatment in human influenza A(H5N1) infections: analysis of a Global Patient Registry.** *The Journal of infectious diseases* 2010, **202**(8):1154-1160.
26. McGeer A, Green KA, Plevneshi A, Shigayeva A, Siddiqi N, Raboud J, Low DE: **Antiviral therapy and outcomes of influenza requiring hospitalization in Ontario, Canada.** *Clin Infect Dis* 2007, **45**(12):1568-1575.
27. Kandun IN, Tresnaningsih E, Purba WH, Lee V, Samaan G, Harun S, Soni E, Septiawati C, Setiawati T, Sariwati E *et al*: **Factors associated with case fatality of human H5N1 virus infections in Indonesia: a case series.** *Lancet* 2008, **372**(9640):744-749.
28. Rizzo C, Ajelli M, Merler S, Pugliese A, Barbetta I, Salmaso S, Manfredi P: **Epidemiology and transmission dynamics of the 1918-19 pandemic influenza in Florence, Italy.** *Vaccine* 2011, **29 Suppl 2**:B27-32.
29. Le MT, Wertheim HF, Nguyen HD, Taylor W, Hoang PV, Vuong CD, Nguyen HL, Nguyen HH, Nguyen TQ, Nguyen TV *et al*: **Influenza A H5N1 clade 2.3.4 virus with a different**

**antiviral susceptibility profile replaced clade 1 virus in humans in northern Vietnam.**

*PLoS One* 2008, **3**(10):e3339.
